# Supplementary material for: Fabricating a novel porous releaser of heparin
Source: Royal Society of Chemistry journal article supplement (doi:10.1039/c4ra09262g), 2014-01-01
Supplement: c4ra09262g1.pdf [file c4ra09262g1.pdf]

## Supporting Information

**Table S1.** Parameters and coefficients obtained for Peppas release kinetic model  $M_t/M_\infty = a \cdot t^b$  fitted to the heparin release profiles from mesoporous zeolite series samples.

| Sample | a     | b     | R <sup>2</sup> |
|--------|-------|-------|----------------|
| MCM-41 | 0.053 | 1.091 | 0.996          |
| MZ1    | 0.289 | 0.441 | 0.994          |
| SBA-15 | 0.311 | 0.486 | 0.969          |
| SZ1    | 0.406 | 0.345 | 0.986          |
| rGO    | 0.464 | 0.265 | 0.989          |

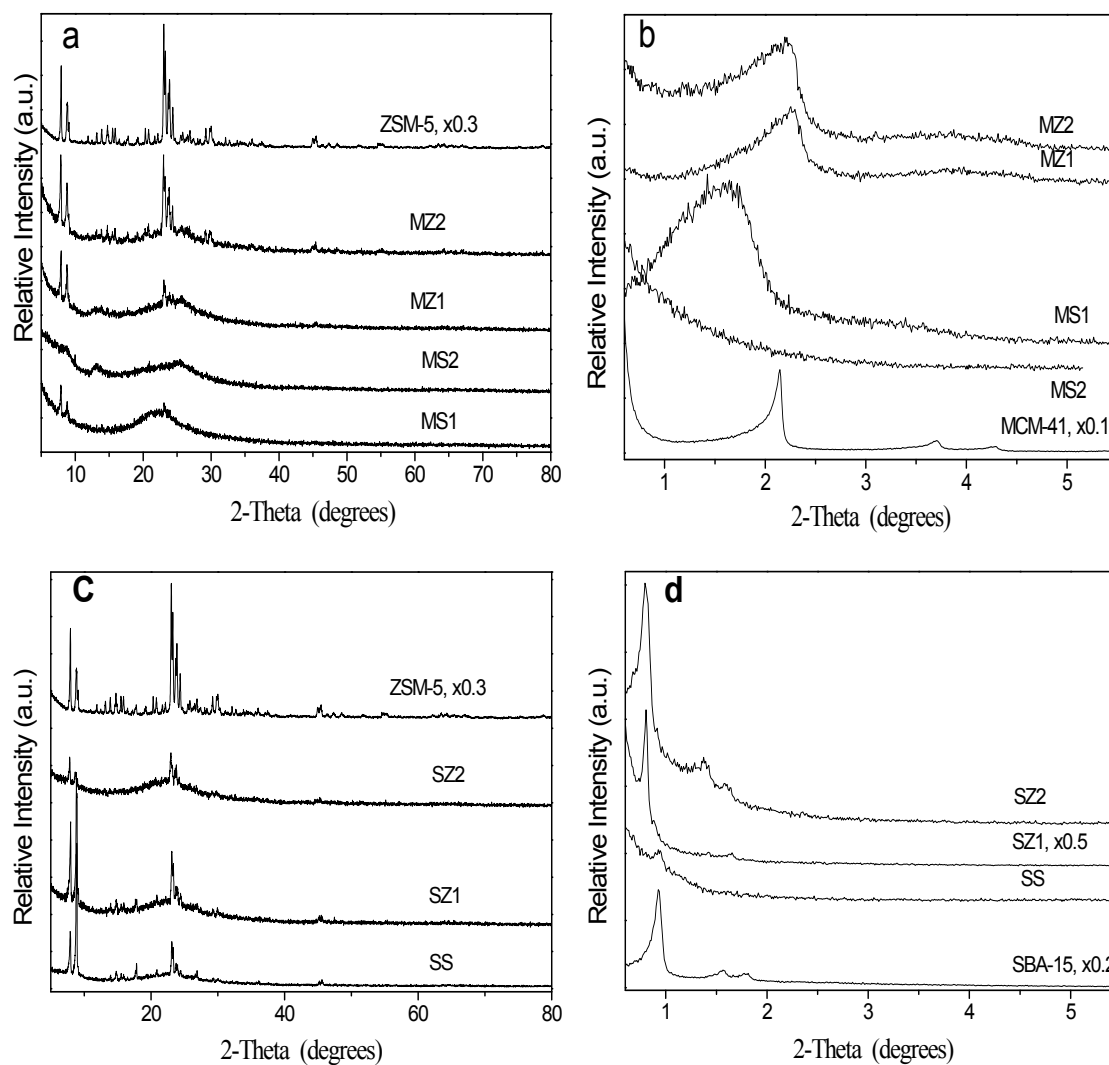

**Figure S1.** XRD patterns (a, c, WXR; b, d, LXR) of mesoporous-zeolite samples.

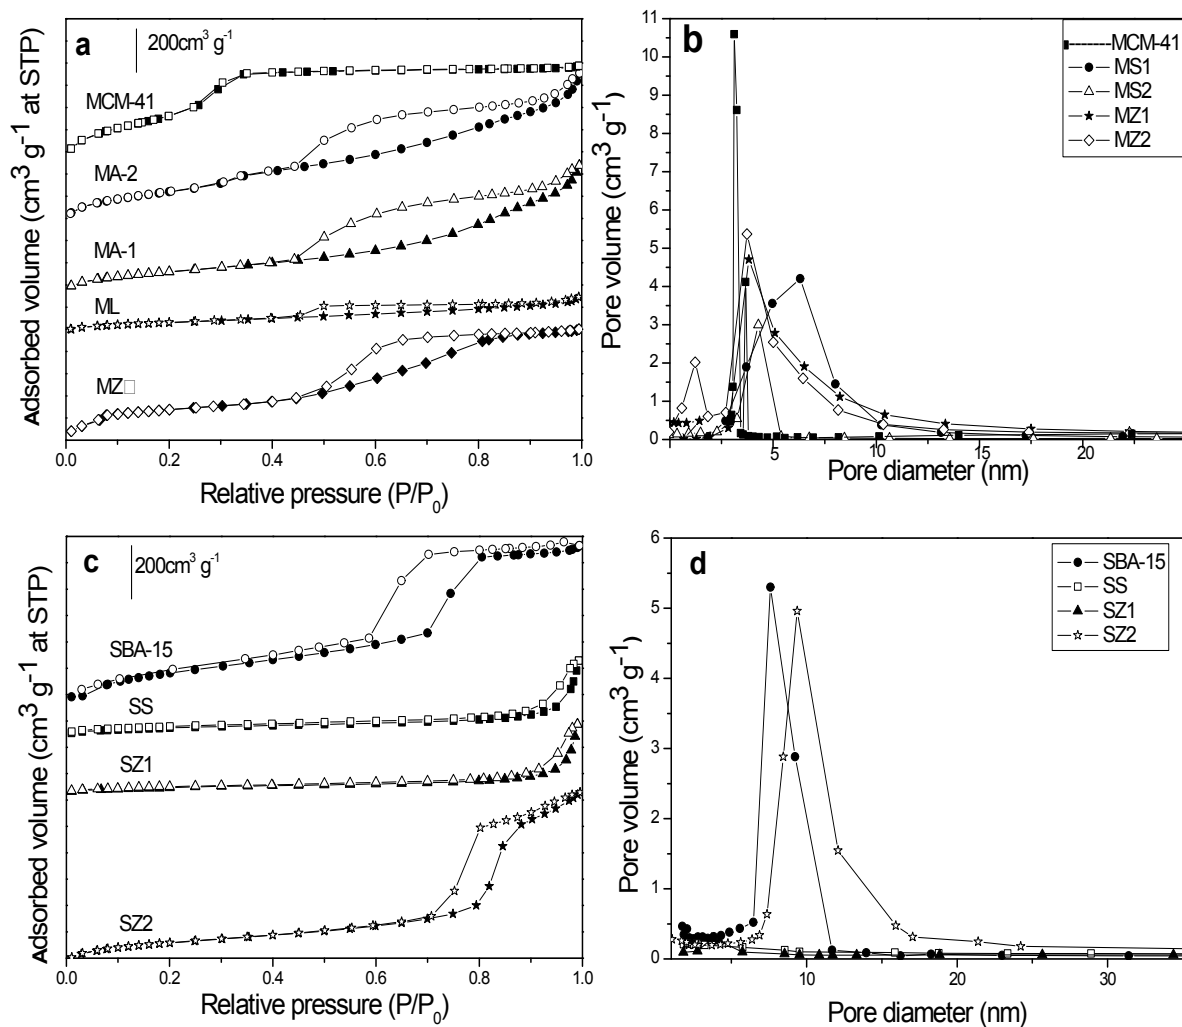

**Figure S2.** The  $\text{N}_2$  adsorption–desorption isotherms (a, c) and pore size distribution (b, d) of the mesoporous-zeolite of M (a, b) and S (a, b) series samples.

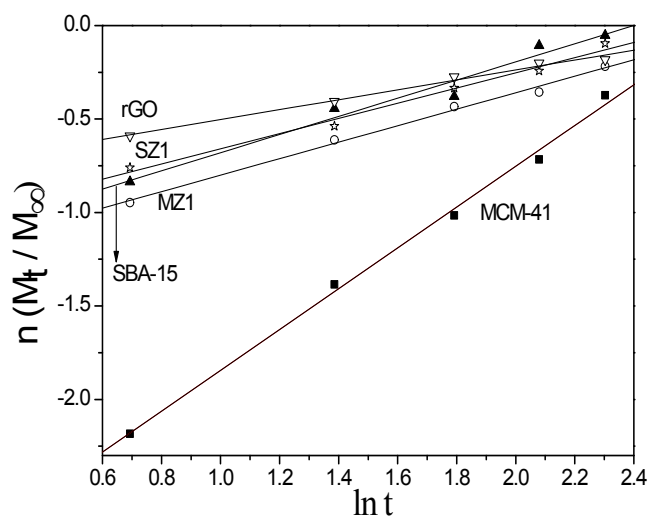

**Figure S3.** Release data fits to Peppas model for samples.
